# Supplementary material for: Unveiling the particle size effect and surface reactivity of Pt/C nanoparticles for ammonia electrooxidation using in situ infrared spectroscopy
Source: Royal Society of Chemistry journal article supplement (doi:10.1039/d3im00063j), 2023-01-01
Supplement: d3im00063j1.pdf [file d3im00063j1.pdf]

## Supporting Information

### **Unveiling the Particle Size Effect and Surface Reactivity of Pt/C Nanoparticles for Ammonia Electrooxidation using In-situ Infrared Spectroscopy**

Niloofar Aligholizadeh K., Ashwini Reddy N., Evans A. Monyoncho, Elena A. Baranova\*

*Department of Chemical and Biological Engineering,  
Centre for Catalysis Research and Innovation (CCRI), University of Ottawa, 161 Louis-Pasteur,  
Ottawa, Ontario, Canada K1N 6N5*

\*Corresponding author: E-mail: elena.baranova@uottawa.ca (Elena A. Baranova)

Cyclic voltammetry was used to analyze ammonia electrooxidation using synthesized Pt/C nanoparticles in 1M KOH. Cyclic voltammetry comparisons in 1 M KOH for Pt 1.3, 2.2, 2.9, and 4.3 nm are shown in Figure S-1. The 10<sup>th</sup> cycle is shown in the potential range of 0 to -0.9 V vs. Hg/HgO at 20 mVs<sup>-1</sup>. The current was normalized by the electrochemical surface area (ECSA) obtained from the integration of the surface under the CV in the adsorption/desorption region in 1 M KOH divided by 210  $\mu\text{C cm}^{-2}$  which is the theoretical charge required to remove a monolayer of H atoms from the platinum surface.

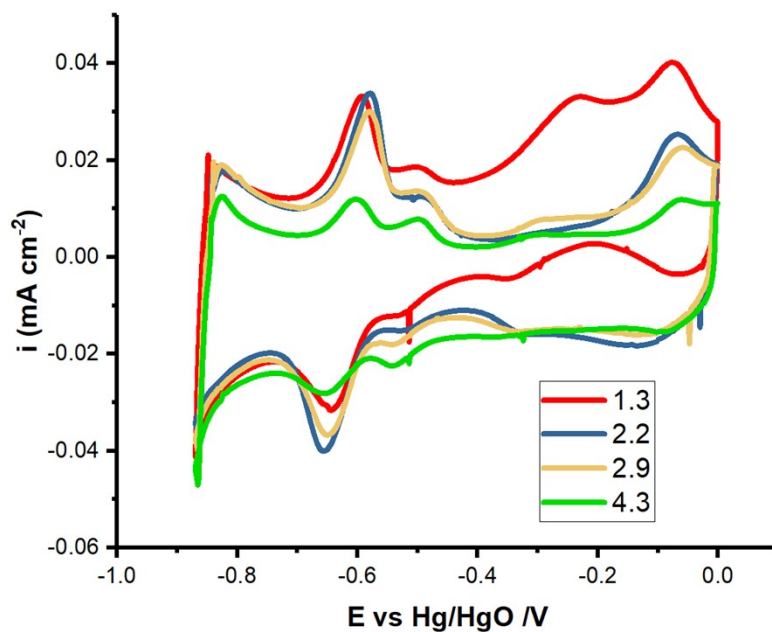

Figure S-1: Cyclic voltammetry of Pt/C NPs of 1.3, 2.2, 2.9, and 4.3 nm average size in 1M KOH at 20 mVs<sup>-1</sup>

A comparison of CVs and a forward scan of CVs in ammonia containing solution is shown in Figure S-3. Pt/C with the smallest particle mean size with 1.3 nm has showed the relatively highest current density. Activity decreases with increase of the particle size which illustrates a direct relation between size and the catalytic activity of Pt nanoparticles in this reaction.

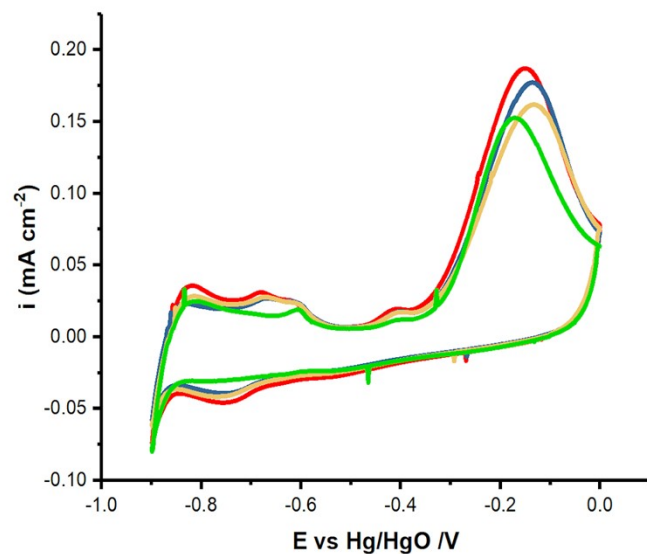

Figure S-2 Cyclic voltammetry of Pt 1.3 nm, Pt 2.2 nm, Pt 2.9 nm and Pt 4.3 nm in 1 M KOH + 0.5 M NH<sub>4</sub>OH at scan rate of 20 mV s<sup>-1</sup>

Prior to collecting the spectra, PM-IRRAS chamber was purged with N<sub>2</sub> (Linde, 99.99%) to remove any CO<sub>2</sub> that could be present from the air and the spectra were taken at intervals of 15, 30, 45, 60, and 75 minutes to follow the CO<sub>2</sub> peak at ~2400 cm<sup>-1</sup>. Figure S-3 shows that the sensitivity was clearly visible both before and after purging. Before each experiment the chamber was purged with N<sub>2</sub> for 60 min.

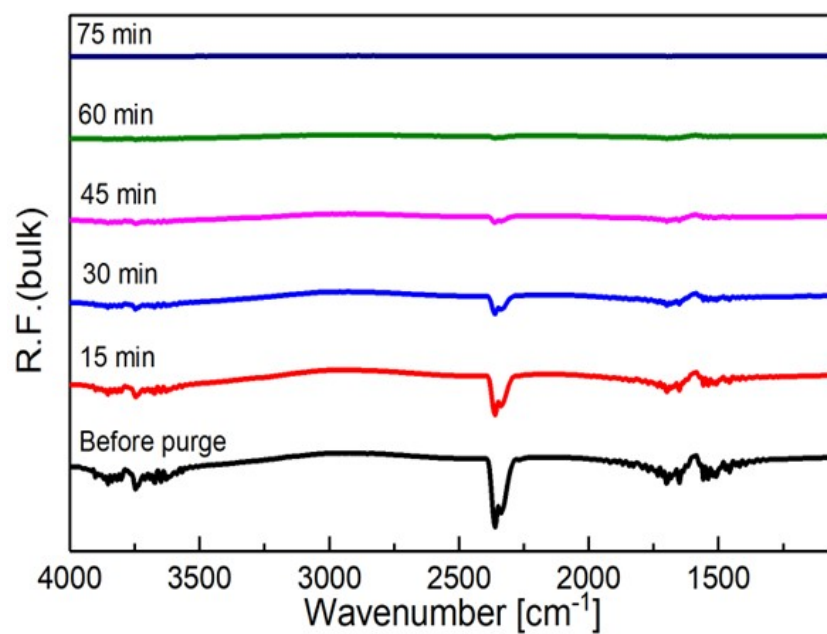

Figure S-3: Purging the IRRAS chamber for different period of time to insure that all CO<sub>2</sub> is removed from the chamber.
